# Supplementary material for: The Role of Deoxycytidine Kinase (dCK) in Radiation-Induced Cell Death
Source: Int J Mol Sci. 2016 Nov 21;17(11):1939. doi: 10.3390/ijms17111939 (PMC5133934; doi:10.3390/ijms17111939)
Supplement: Supplementary file 1 [file ijms-17-01939-s001.pdf]

# Supplementary Materials: The Role of dCK in Radiation-Induced Cell Death

Rui Zhong, Rui Xin, Zongyan Chen, Nan Liang, Yang Liu, Shumei Ma and Xiaodong Liu

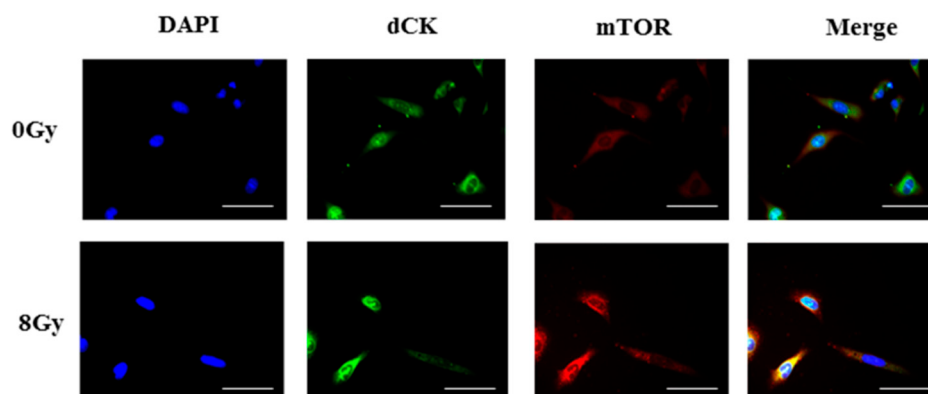

**Figure S1.** dCK was co-localized with mTOR. Cells were fixed and then immunostained by DAPI (blue), dCK antibody (green) and mTOR antibody (red). Scale bar, 10  $\mu$ m.

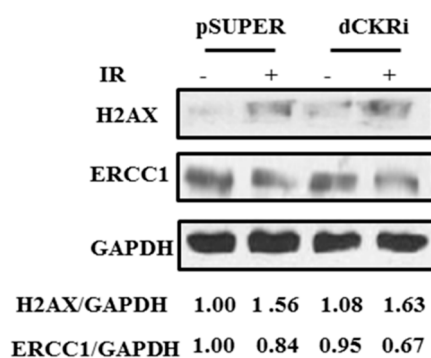

**Figure S2.** Expression levels of H2AX and ERCC1 following IR treatment. Isogenic HeLa cells stably expressing control or dCK shRNA were treated with mock or IR (8 Gy). 12 h after radiation, whole cell lysates were harvested and subjected to western blot using indicated antibodies.
